# Supplementary material
Source: PubMed Central journal article supplement (PMC11132952)
Supplement: NIHMS1949186-supplement-1.pdf [file NIHMS1949186-supplement-1.pdf]

# Supplemental Material to Dose Optimization for Cancer Treatments with Considerations for Late-onset Toxicities

by Lucie Biard, Anaïs Andrillon, Rebecca B Silva and Shing M Lee

November 2023

**Table S1:** Simulations results for the idelalisib example: percent of recommendations of each dose level (D1 to D5) estimated over 10000 simulated trials, with a 4-week or 16-week observation window for toxicity, a total sample size of 30 patients, an accrual rate of 2 patients per month.

| Hazard                                          |                              | D1    | D2           | D3           | D4    | D5           | Duration  |
|-------------------------------------------------|------------------------------|-------|--------------|--------------|-------|--------------|-----------|
| 16-week obs. window (8 patients per obs.window) |                              |       |              |              |       |              |           |
| Constant                                        | True Probability of Toxicity | 0.10  | <b>0.25</b>  | 0.45         | 0.60  | 0.75         |           |
|                                                 | % recommended by TITE-CRM    | 19    | <b>66</b>    | 15           | 0     | 0            | 76 weeks  |
|                                                 | % recommended by TITE-BOIN   | 15    | <b>71</b>    | 13           | 1     | 0            | 100 weeks |
| 4 week obs. window (2 patients per obs.window)  |                              |       |              |              |       |              |           |
| Decreasing                                      | True Probability of Toxicity | 0.077 | <b>0.196</b> | 0.364        | 0.501 | 0.650        |           |
|                                                 | % recommended by TITE-CRM    | 5     | <b>55</b>    | 37           | 3     | 0            | 64 weeks  |
|                                                 | % recommended by TITE-BOIN   | 6     | <b>61</b>    | 30           | 3     | 0            | 62 weeks  |
| Decreasing                                      | True Probability of Toxicity | 0.056 | 0.147        | <b>0.281</b> | 0.396 | 0.534        |           |
|                                                 | % recommended by TITE-CRM    | 1     | 28           | <b>52</b>    | 17    | 1            | 64 weeks  |
|                                                 | % recommended by TITE-BOIN   | 1     | 37           | <b>47</b>    | 13    | 1            | 62 weeks  |
| Constant                                        | True Probability of Toxicity | 0.026 | 0.069        | 0.139        | 0.205 | <b>0.293</b> |           |
|                                                 | % recommended by TITE-CRM    | 0     | 1            | 14           | 42    | <b>43</b>    | 64 weeks  |
|                                                 | % recommended by TITE-BOIN   | 0     | 4            | 22           | 38    | <b>36</b>    | 62 weeks  |

**Table S2:** Dose-finding designs for late-onset toxicities incorporating toxicity and efficacy.

| Authors                                      | Dose-finding objective                                                                                   | Recommends<br>>1 dose | Preliminary<br>toxicity-centered stage                          |
|----------------------------------------------|----------------------------------------------------------------------------------------------------------|-----------------------|-----------------------------------------------------------------|
| <b><i>Binary outcomes</i></b>                |                                                                                                          |                       |                                                                 |
| Jin et al. (2014) <sup>1</sup>               | MDD: dose maximizing a desirability function summarizing the toxicity/efficacy trade-off                 | No                    | No                                                              |
| Liu & Johnson (2016) <sup>2</sup>            | MDD: dose with the highest utility function                                                              | No                    | No                                                              |
| Rivière et al. (2018) <sup>3</sup>           | OD: lowest safe dose which maximizes efficacy                                                            | No                    | Ruled-based start-up stage until the first toxicity is observed |
| Yan et al. (2019) <sup>4</sup>               | OD: dose with the highest efficacy among safe doses                                                      | Possibly              | No                                                              |
| Takeda et al. (2020) <sup>5</sup>            | OD: dose lower or equal to the MTD which maximizes efficacy                                              | No                    | No                                                              |
| Zhang & Zang (2021) <sup>6</sup>             | MDD: dose with the highest utility function                                                              | No                    | Yes                                                             |
| Zhou et al. (2022) <sup>7</sup>              | MDD: dose with the highest utility among doses equal or lower to the MTD                                 | No                    | No                                                              |
| <b><i>Time to event outcomes</i></b>         |                                                                                                          |                       |                                                                 |
| Yuan & Yin (2009) <sup>8</sup>               | OD: dose with the higher AUSC value while satisfying acceptable toxicity requirement                     | No                    | No                                                              |
| Koopmeiners & Modiano (2014) <sup>9</sup>    | MDD: dose maximizing a desirability function summarizing the toxicity/efficacy trade-off                 | No                    | No                                                              |
| Altzerinakou & Paoletti (2019) <sup>10</sup> | OD: lowest dose, within a range of highly active doses, below or equal to the MTD                        | No                    | Ruled-based start-up stage followed by a Time-to-DLT CRM        |
| Biard et al. (2021) <sup>11</sup>            | OD: dose with acceptable toxicity risk and minimum progression risk in terms of marginal rates of events | Possibly              | Ruled-based start-up stage until the first toxicity is observed |
| Zhang et al. (2021) <sup>12</sup>            | MDD: dose with the highest utility among an admissible set in terms of toxicity                          | Possibly              | Yes                                                             |
| Andrillon et al. (2022) <sup>13</sup>        | OD: dose equal or lower to the MTD with the minimum progression cumulative incidence                     | No                    | No                                                              |

**Table S3:** Dose-finding designs for late-onset toxicities incorporating toxicity and efficacy: statistical considerations.

| Authors                                      | Non-monotone dose-efficacy relationship | Method for pending data                                   | Smallest sample size explored | Available software                                               |
|----------------------------------------------|-----------------------------------------|-----------------------------------------------------------|-------------------------------|------------------------------------------------------------------|
| <b>Binary outcomes</b>                       |                                         |                                                           |                               |                                                                  |
| Jin et al. (2014) <sup>1</sup>               | Yes                                     | Data augmentation process                                 | N=48                          | None listed                                                      |
| Liu & Johnson (2016) <sup>2</sup>            | No                                      | Weighting scheme                                          | N=48                          | None listed                                                      |
| Riviere et al. (2018) <sup>3</sup>           | Yes                                     | Weighting scheme                                          | N=36                          | R package <code>dfmta</code>                                     |
| Yan et al. (2019) <sup>4</sup>               | Yes                                     | Weighting scheme                                          | N=35                          | None listed                                                      |
| Takeda et al. (2020) <sup>5</sup>            | Yes                                     | Weighting scheme                                          | N=36                          | SAS code upon request                                            |
| Zhang & Zang (2021) <sup>6</sup>             | Yes                                     | Weighting scheme                                          | N=60                          | R code available on GitHub <a href="#">CWL</a>                   |
| Zhou et al. (2022) <sup>7</sup>              | Yes                                     | Weighting scheme, Imputation or Data augmentation process | N=36                          | R shiny app <a href="http://trialdesign.org">trialdesign.org</a> |
| <b>Right-censored outcomes</b>               |                                         |                                                           |                               |                                                                  |
| Yuan & Yin (2009) <sup>8</sup>               | No                                      | Cure rate survival model                                  | N=48                          | None listed                                                      |
| Koopmeiners & Modiano (2014) <sup>9</sup>    | Yes                                     | Cure rate survival model                                  | N=30                          | None listed                                                      |
| Altzerinakou & Paoletti (2019) <sup>10</sup> | Yes                                     | Probit time-to-DLT model                                  | N=15                          | None listed                                                      |
| Biard et al. (2021) <sup>11</sup>            | Yes                                     | Exponential survival model                                | N=50                          | R code upon request                                              |
| Zhang et al. (2021) <sup>12</sup>            | No                                      | Data augmentation process                                 | N=60                          | R code as supplementary material                                 |
| Andrillon et al. (2022) <sup>13</sup>        | No                                      | Exponential survival model                                | N=45                          | R code upon request                                              |

## References

- [1] Jin IH, Liu S, Thall PF et al. Using data augmentation to facilitate conduct of phase I–II clinical trials with delayed outcomes. *Journal of the American Statistical Association* 2014; 109(506): 525–536.
- [2] Liu S and Johnson VE. A robust Bayesian dose-finding design for phase I/II clinical trials. *Biostatistics* 2016; 17(2): 249–263.
- [3] Riviere MK, Yuan Y, Jourdan JH et al. Phase I/II dose-finding design for molecularly targeted agent: plateau determination using adaptive randomization. *Statistical methods in medical research* 2018; 27(2): 466–479.
- [4] Yan D, Tait C, Wages NA et al. Generalization of the time-to-event continual reassessment method to bivariate outcomes. *Journal of Biopharmaceutical Statistics* 2019; 29(4): 635–647.
- [5] Takeda K, Morita S and Taguri M. TITE-BOIN-ET: time-to-event Bayesian optimal interval design to accelerate dose-finding based on both efficacy and toxicity outcomes. *Pharmaceutical Statistics* 2020; 19(3): 335–349.

- [6] Zhang Y and Zang Y. CWL: A conditional weighted likelihood method to account for the delayed joint toxicity–efficacy outcomes for phase I/II clinical trials. *Statistical Methods in Medical Research* 2021; 30(3): 892–903.
- [7] Zhou Y, Lin R, Lee JJ et al. Tite-boin12: A Bayesian phase I/II trial design to find the optimal biological dose with late-onset toxicity and efficacy. *Statistics in medicine* 2022; 41(11): 1918–1931.
- [8] Yuan Y and Yin G. Bayesian dose finding by jointly modelling toxicity and efficacy as time-to-event outcomes. *Journal of the Royal Statistical Society: Series C (Applied Statistics)* 2009; 58(5): 719–736.
- [9] Koopmeiners JS and Modiano J. A Bayesian adaptive phase I–II clinical trial for evaluating efficacy and toxicity with delayed outcomes. *Clinical Trials* 2014; 11(1): 38–48.
- [10] Altzerinakou MA and Paoletti X. An adaptive design for the identification of the optimal dose using joint modeling of continuous repeated biomarker measurements and time-to-toxicity in phase I/II clinical trials in oncology. *Statistical methods in medical research* 2020; 29(2): 508–521.
- [11] Biard L, Lee SM and Cheng B. Seamless phase I/II design for novel anticancer agents with competing disease progression. *Statistics in medicine* 2021; 40(21): 4568–4581.
- [12] Zhang Y, Cao S, Zhang C et al. A Bayesian adaptive phase I/II clinical trial design with late-onset competing risk outcomes. *Biometrics* 2021; 77(3): 796–808.
- [13] Andrillon A, Chevret S, Lee SM et al. Surv-CRM-12: A Bayesian phase I/II survival CRM for right-censored toxicity endpoints with competing disease progression. *Statistics in Medicine* 2022; 41(29): 5753–5766.
